# Supplementary material
Source: MDPI journal article supplement (https://www.mdpi.com/2073-4395/9/9/487)
Supplement: s1 [file s1]

## Sheet: Table S1.
Table S1: SSR genotyping matrix.
Twelve SSR amplified in 14 local cultivars of Prunus salicina, two introduced genotypes ("Santa Rosa" and "Reina Claudia") and two cultivars of peach (“Sol de Mayo” and “Zelanda”). Included are genotypes, yellow or reddish flesh, primer names (Mnejja et al., 2004) and size of alleles (bp).
Genotype	flesh color	CPSCT11		CPSCT18		CPSCT21		CPSCT22		CPSCT24		CPSCT25		CPSCT26		CPSCT27		CPSCT30		CPSCT34		CPSCT42		CPSCT44
"Ratto"	red flesh plum	183	183	155	155	141	141	162	159	175	175	184	193	193	193	137	137	181	190	185	214	185	181	223	223
"Remolacha de Leber"	red flesh plum	185	185	155	155	0	0	162	159	175	175	193	193	181	181	147	147	181	190	185	211	185	176	223	223
"Capri"	red flesh plum	183	183	155	155	141	147	0	0	157	175	193	193	193	176	0	0	179	183	214	214	176	176	241	241
"Gigaglia"	red flesh plum	183	185	151	172	132	132	162	159	175	175	184	193	193	193	137	147	181	190	211	224	185	176	241	218
"Fragata"	red flesh plum	185	185	155	155	141	141	160	159	175	175	193	223	193	193	137	137	183	190	185	214	185	181	241	223
"Severiana"	red flesh plum	183	183	155	155	141	141	162	159	161	175	184	193	193	193	147	147	181	190	185	211	181	181	223	223
"Ciervita"	red flesh plum	0	0	155	155	147	147	159	159	157	179	184	193	193	193	147	147	179	183	211	211	176	176	229	229
"Remolacha de Berisso"	red flesh plum	183	183	155	155	0	0	162	159	0	0	193	199	193	193	148	148	181	183	177	214	185	176	223	223
"Giordano"	red flesh plum	183	183	155	155	141	147	168	159	175	175	184	193	193	193	137	147	183	190	185	211	176	176	229	229
"Juanita"	yellow flesh plum	171	183	153	157	136	136	168	159	175	179	0	0	184	181	137	147	183	200	185	211	181	167	229	229
"Reina de oro"	yellow flesh plum	181	189	172	172	134	141	179	164	161	179	184	184	184	181	147	147	193	196	185	185	181	167	229	229
"Gascón"	yellow flesh plum	171	171	155	159	132	157	166	160	157	179	184	184	181	176	147	156	179	190	195	224	176	173	0	0
"Tricerri"	yellow flesh plum	171	183	153	153	0	0	159	159	157	179	184	181	184	176	147	147	183	183	211	211	176	167	229	229
"X"	yellow flesh plum	171	187	0	0	147	147	159	159	157	179	0	0	184	176	146	146	183	183	185	185	176	167	226	226
"Reina Claudia"	yellow flesh plum	171	176	159	172	136	136	166	159	164	179	184	184	193	176	147	156	183	200	211	211	176	176	229	229
"Santa Rosa"	yellow flesh plum	171	187	172	172	141	141	179	159	157	157	181	187	195	184	147	147	183	196	185	185	181	167	226	223
"Sol de Mayo"	peach	178	178	162	162	138	138	164	164	153	153	165	165	178	178	142	142	179	179	0	0	169	169	0	0
"Zelanda"	peach	178	178	162	162	138	138	168	168	153	153	165	165	178	178	144	144	179	179	195	195	169	162	0	0

## Sheet: Table S2.
Table S2: Shared alleledistance (DAS) matrix.
	"Ratto"	"Remolacha de Leber"	"Capri"	"Gigaglia"	"Fragata"	"Reina Claudia"	"Juanita"	"Severiana"	"Ciervita"	"Reina de oro"	"Gascón"	"Remolacha de Berisso"	"Tricerri"	"X"	"Santa Rosa"	"Giordano"	"Sol de Mayo"	"Zelanda"
"Ratto"	0
"Remolacha de Leber"	0.35	0
"Capri"	0.55	0.67	0
"Gigaglia"	0.45	0.45	0.7	0
"Fragata"	0.27	0.4	0.55	0.55	0
"Reina Claudia"	0.86	0.85	0.75	0.73	0.86	0
"Juanita"	0.75	0.72	0.83	0.8	0.75	0.5	0
"Severiana"	0.14	0.4	0.6	0.5	0.41	0.82	0.7	0
"Ciervita"	0.65	0.67	0.44	0.65	0.65	0.45	0.67	0.6	0
"Reina de oro"	0.82	0.9	0.95	0.91	0.86	0.73	0.6	0.77	0.8	0
"Gascón"	0.85	0.78	0.72	0.75	0.85	0.6	0.83	0.85	0.67	0.8	0
"Remolacha de Berisso"	0.22	0.44	0.44	0.5	0.44	0.78	0.81	0.33	0.5	1	0.88	0
"Tricerri"	0.85	0.85	0.72	0.75	0.9	0.45	0.39	0.8	0.39	0.7	0.67	0.78	0
"X"	0.89	0.81	0.69	0.89	0.83	0.67	0.61	0.89	0.5	0.72	0.69	0.79	0.31	0
"Santa Rosa"	0.73	0.85	0.85	0.91	0.68	0.82	0.65	0.73	0.85	0.55	0.9	0.83	0.65	0.44	0
"Giordano"	0.36	0.5	0.4	0.5	0.45	0.59	0.55	0.36	0.3	0.77	0.8	0.44	0.6	0.72	0.82	0
"Sol de Mayo"	1	1	0.94	1	1	1	1	1	0.94	0.94	0.94	1	1	1	1	1	0
"Zelanda"	1	1	0.94	1	1	1	0.94	1	0.94	1	0.9	1	1	1	1	0.95	0.17	0
Fourteen local cultivars of Prunus salicina, two introduced genotypes ("Santa Rosa" and "Reina Claudia") and two cultivars of peach (“Sol de Mayo” and “Zelanda”)

## Sheet: Table S3.
Table S3: Mapping and annotation of nearby genes (<25 kb window) to polymorphic SSR on the Prunus persica genome.
Included are primer names (Mnejja et al. 2004), accession number; Chromosome, alignment and genes of Prunus persica genome; genes described in Arabidopsis (Ara name, symbol and function); Gene Ontology term and description.
Prunus salicina		Prunus persica							Arabidopsis
PRIMER	Sequence	Chromosome	Align Start	Align End	Gene	Gene_start	Gene_end	Strand	Ara Name	Ara Symbol	Ara Function	Gene Ontology	Gene Ontology description
CPSCT024	AY426209.1	Pp01	28058204	28058903	Prupe.1G274300	28043845	28045782	+	AT1G26870.1	ANAC009 , FEZ	NAC (No Apical Meristem) domain transcriptional regulator superfamily protein (*)	GO:0006355 , GO:0003677	regulation of transcription, DNA-templated , DNA binding
					Prupe.1G274400	28046954	28048070	+	AT1G74590.1	ATGSTU10 , GSTU10	glutathione S-transferase TAU 10 (*)	GO:0005515	protein binding
					Prupe.1G274500	28047902	28049619	-	AT1G26880.1		Ribosomal protein L34e superfamily protein	GO:0006412 , GO:0005840 , GO:0005622 , GO:0003735	translation , ribosome , intracellular , structural constituent of ribosome
					Prupe.1G274600	28052037	28056149	+	AT5G39785.1		Protein of unknown function (DUF1666)	GO:0006412 , GO:0005840 , GO:0005622 , GO:0003735	translation , ribosome , intracellular , structural constituent of ribosome
					Prupe.1G274700	28058395	28059444	-	AT1G69600.1	ATHB29 , ZFHD1	zinc finger homeodomain 1
					Prupe.1G274800	28063689	28063982	-	AT1G69588.1	CLE45	CLAVATA3/ESR-RELATED 45 (***)
					Prupe.1G274900	28068604	28072064	-	AT1G14260.1		RING/FYVE/PHD zinc finger superfamily protein (*)	GO:0008270	zinc ion binding
					Prupe.1G275000	28073655	28077627	-	AT2G02970.1		GDA1/CD39 nucleoside phosphatase family protein	GO:0016787	hydrolase activity
CPSCT027	AY426212.1	Pp01	23010058	23010528	Prupe.1G216600	22984800	22988311	+	AT5G13290.2	CRN , SOL2	Protein kinase superfamily protein	GO:0006468 , GO:0004672	protein phosphorylation , protein kinase activity
					Prupe.1G216700	22989569	22990735	+	AT3G26740.1	CCL	CCR-like	GO:0030003	cellular cation homeostasis
					Prupe.1G216800	22990762	22992555	-	AT3G23255.2
					Prupe.1G216900	22992748	22996976	-	AT5G13280.1	AK , AK-LYS1 , AK1	aspartate kinase 1	GO:0008652	cellular amino acid biosynthetic process
					Prupe.1G217000	22997381	23000585	+	AT5G13270.1	RARE1	Pentatricopeptide repeat (PPR) superfamily protein	GO:0016556	mRNA modification
					Prupe.1G217100	23000849	23004837	+	AT1G28100.2
					Prupe.1G217200	23003836	23007490	-	AT1G28110.1	SCPL45	serine carboxypeptidase-like 45	GO:0006508 , GO:0004185	proteolysis , serine-type carboxypeptidase activity5
					Prupe.1G217300	23011038	23016976	-	AT5G13260.1
					Prupe.1G217400	23018464	23019834	-	AT1G09720.1		Kinase interacting (KIP1-like) family protein	GO:0008150	biological_process
					Prupe.1G217500	23020728	23021272	+
					Prupe.1G217600	23021335	23026772	-	AT2G33540.1	ATCPL3 , CPL3	C-terminal domain phosphatase-like 3 (*)	GO:0000394, GO:0006366, GO:0009651, GO:0009788	RNA splicing, via endonucleolytic cleavage and ligation, response to salt stress, negative regulation of abscisic acid mediated signaling pathway
CPSCT021	AY426206.1	Pp02	27308766	27309699	Prupe.2G266500	27284179	27286802	-	AT2G40800.1
					Prupe.2G266600	27298714	27301299	-	AT1G26910.1	RPL10B	Ribosomal protein L16p/L10e family protein	GO:0006412 , GO:0005840 , GO:0003735	translation , ribosome , structural constituent of ribosome
					Prupe.2G266700	27301102	27304315	+	AT3G10850.1	GLX2-2 , GLY2	Metallo-hydrolase/oxidoreductase superfamily protein	GO:0019288	isopentenyl diphosphate biosynthetic process, mevalonate-independent pathway
					Prupe.2G266800	27304839	27309086	+	AT5G01960.1		RING/U-box superfamily protein	GO:0008270	zinc ion binding
					Prupe.2G266900	27311520	27313858	+
					Prupe.2G267000	27313859	27314996	+
					Prupe.2G267100	27315822	27319309	+	AT2G40810.2	ATATG18C , ATG18C	homolog of yeast autophagy 18C
					Prupe.2G267200	27321832	27325143	+	AT3G10840.1		alpha/beta-Hydrolases superfamily protein (**)
					Prupe.2G267300	27325404	27326678	-	AT2G40815.1		Calcium-dependent lipid-binding (CaLB domain) family protein	GO:0005515	protein binding
					Prupe.2G267400	27326921	27328846	-	AT4G19985.1		Acyl-CoA N-acyltransferases (NAT) superfamily protein (**)	GO:0008080	N-acetyltransferase activity
					Prupe.2G267500	27328847	27336975	-	AT1G20670.1		DNA-binding bromodomain-containing protein	GO:0005515	protein binding
CPSCT034	AY426219.1	Pp02	29946149	29946699	Prupe.2G322500	29920126	29923190	+	AT5G24680.1		Peptidase C78 , ubiquitin fold modifier-specific peptidase 1/ 2
					Prupe.2G322600	29923247	29927877	-	AT3G28860.1	ABCB19 , ATABCB19 , ATMDR1 , ATMDR11 , ATPGP19 , MDR1 , MDR11 , PGP19	ATP binding cassette subfamily B19	GO:0016887 , GO:0005524 , GO:0055085 , GO:0042626 , GO:0016021 , GO:0006810	ATPase activity , ATP binding , transmembrane transport , ATPase activity, coupled to transmembrane movement of substances , integral component of membrane , transport
					Prupe.2G322700	29929203	29939055	+	AT2G02560.2	ATCAND1 , CAND1 , ETA2 , HVE , TIP120	cullin-associated and neddylation dissociated
					Prupe.2G322800	29941158	29941991	+	AT3G22810.1		Plant protein of unknown function (DUF828) with plant pleckstrin homology-like region
					Prupe.2G322900	29942301	29944387	-	AT2G44870.1
					Prupe.2G323000	29944519	29947808	+	AT2G36740.1	ATSWC2 , SWC2	sequence-specific DNA binding transcription factors;DNA binding;DNA binding	GO:0043486 , GO:0006355 , GO:0006338 , GO:0005634	histone exchange , regulation of transcription, DNA-templated , chromatin remodeling , nucleus
					Prupe.2G323100	29947943	29951071	+	AT1G09320.1		agenet domain-containing protein (**)	GO:0009688	abscisic acid biosynthetic process
					Prupe.2G323200	29951381	29953296	-	AT3G49010.1	ATBBC1 , BBC1 , RSU2	breast basic conserved 1	GO:0006412 , GO:0005840 , GO:0005622 , GO:0003735	translation , ribosome , intracellular , structural constituent of ribosome
					Prupe.2G323300	29954562	29957410	+	AT5G42310.1		Pentatricopeptide repeat (PPR-like) superfamily protein
					Prupe.2G323400	29959862	29962852	-	AT5G17165.1
					Prupe.2G323500	29964639	29966612	+	AT5G17170.1	ENH1	rubredoxin family protein	GO:0009535, GO:0009637, GO:0010114 ,GO:0010207 GO:0010218	chloroplast thylakoid membrane, response to blue light, response to red light, response to far red light, photosystem II assembly
					Prupe.2G323600	29967914	29970588	+	AT5G17210.1		Protein of unknown function (DUF1218)
CPSCT044	AY426228.1	Pp02	20793617	20794126	Prupe.2G153500	20767272	20772523	-	AT5G35730.1		EXS (ERD1/XPR1/SYG1) family protein	GO:0016021	integral component of membrane
					Prupe.2G153600	20771510	20779923	+	AT1G01920.2		SET domain-containing protein (*)	GO:0005515, GO:0009560	protein binding, embryo sac egg cell differentiation
					Prupe.2G153700	20779290	20781786	-
					Prupe.2G153800	20790705	20794055	-	AT1G12600.1		UDP-N-acetylglucosamine (UAA) transporter family	GO:0055085	transmembrane transport
					Prupe.2G153900	20801006	20803832	-	AT4G00770.1
					Prupe.2G154000	20811304	20815308	+	AT1G01880.1		5\'-3\' exonuclease family protein	GO:0006281 , GO:0004518	DNA repair , nuclease activity
					Prupe.2G154100	20815857	20818281	+	AT4G16110.1	ARR2 , RR2	response regulator 2	GO:0000160	phosphorelay signal transduction system
CPSCT025	AY426210.1	Pp03	6709070	6709740	Prupe.3G090000	6695922	6699731	+	AT3G42170.1		BED zinc finger ;hAT family dimerisation domain	GO:0003677 , GO:0046983	DNA binding , protein dimerization activity
					Prupe.3G090100	6699900	6702574	+	AT3G15930.1		Pentatricopeptide repeat (PPR) superfamily protein
					Prupe.3G090200	6703446	6705395	+	AT1G52530.1		Hus1-like protein	GO:0030896 , GO:0006281 , GO:0000077	checkpoint clamp complex , DNA repair , DNA damage checkpoint
					Prupe.3G090300	6705492	6708895	-	AT1G52520.1	FRS6	FAR1-related sequence 6 (***)	GO:0008270 , GO:0006355	zinc ion binding , regulation of transcription, DNA-templated
					Prupe.3G090400	6709394	6712188	-	AT1G52520.1	FRS6	FAR1-related sequence 6 (***)	GO:0008270 , GO:0006355	zinc ion binding , regulation of transcription, DNA-templated
					Prupe.3G090500	6713707	6718991	-	AT1G80010.1	FRS8	FAR1-related sequence 8 (***)	GO:0006355	regulation of transcription, DNA-templated
					Prupe.3G090600	6721549	6731646	+	AT1G52510.1		alpha/beta-Hydrolases superfamily protein (**)
					Prupe.3G090700	6731589	6735563	-	AT1G52500.2	ATFPG-1 , ATFPG-2 , ATMMH-1 , ATMMH-2 , FPG-1 , FPG-2 , MMH-1 , MMH-2, MUTM HOMOLOG	MUTM homolog-1	GO:0016799 , GO:0008270 , GO:0006284 , GO:0003906 , GO:0003684 , GO:0006289	hydrolase activity, hydrolyzing N-glycosyl compounds , zinc ion binding , base-excision repair , DNA-(apurinic or apyrimidinic site) lyase activity , damaged DNA binding , nucleotide-excision repair
CPSCT011	AY426199.1	Pp05	4163117	4164052	Prupe.5G036400	4146686	4147456	+	AT5G46770.1
					Prupe.5G036500	4148752	4151768	-	AT1G32630.1
					Prupe.5G036600	4155069	4158442	+	AT2G35230.1	IKU1	VQ motif-containing protein (***)	GO:0009960, GO:0030048, GO:0080113	endosperm development, actin filament-based movement, regulation of seed growth
					Prupe.5G036700	4162147	4162647	+
					Prupe.5G036800	4163933	4164568	-	AT4G17870.1	PYR1 , RCAR11	Polyketide cyclase/dehydrase and lipid transport superfamily protein (***)	GO:0009738 , GO:0010029	abscisic acid mediated signaling pathway, regulation of seed germination
					Prupe.5G036900	4168703	4171201	-	AT5G46795.1	MSP2	microspore-specific promoter 2 (***)	GO:0009555	pollen development
					Prupe.5G037000	4177031	4182789	+	AT4G17950.1		AT hook motif DNA-binding family protein
					Prupe.5G037100	4184421	4185506	+	AT2G35290.1	SAUR 79	Small auxin upregulated RNA 79	GO:0009741	response to brassinosteroid stimulus
					Prupe.5G037200	4185952	4187004	-	AT2G03200.1		Eukaryotic aspartyl protease family protein	GO:0006508 , GO:0004190	proteolysis , aspartic-type endopeptidase activity
CPSCT022	AY426207.1	Pp05	16620819	16621314	Prupe.5G208200	16606205	16608512	+	AT3G08900.1	RGP , RGP3	reversibly glycosylated polypeptide 3 (***)	GO:0030244 , GO:0016866	cellulose biosynthetic process , intramolecular transferase activity
					Prupe.5G208300	16610165	16614774	-	AT1G69170.1		Squamosa promoter-binding protein-like (SBP domain) transcription factor family protein (**)	GO:0005634 , GO:0003677	nucleus , DNA binding
					Prupe.5G208400	16620814	16625385	+	AT5G15800.1	AGL2 , SEP1	K-box region and MADS-box transcription factor family protein (**)	GO:0046983 , GO:0003677 , GO:0006355 , GO:0005634 , GO:0003700	protein dimerization activity, DNA binding , regulation of transcription, DNA-templated , nucleus , sequence-specific DNA binding transcription factor activity
					Prupe.5G208500	16629361	16632684	+	AT5G60910.1	AGL8 , FUL	AGAMOUS-like 8 (**)	GO:0046983 , GO:0003677 , GO:0006355 , GO:0005634 , GO:0003700	protein dimerization activity , DNA binding , regulation of transcription, DNA-templated , nucleus , sequence-specific DNA binding transcription factor activity
					Prupe.5G208600	16633169	16635401	+	AT5G17390.1		Adenine nucleotide alpha hydrolases-like superfamily protein (*)	GO:0006950	response to stress
					Prupe.5G208700	16635402	16638496	-	AT5G17400.1	ER-ANT1	endoplasmic reticulum-adenine nucleotide transporter 1
					Prupe.5G208800	16638479	16639902	+
					Prupe.5G208900	16641861	16644733	+	AT1G18580.1	GAUT11	galacturonosyltransferase 11	GO:0016757 , GO:0047262	transferase activity, transferring glycosyl groups , polygalacturonate 4-alpha-galacturonosyltransferase activity
CPSCT030	AY426215.1	Pp05	15121388	15122031	Prupe.5G179400	15099758	15103048	-
					Prupe.5G179500	15105653	15106328	+	AT5G13690.1	CYL1 , NAGLU	alpha-N-acetylglucosaminidase family / NAGLU family
					Prupe.5G179600	15110249	15110916	+	AT3G48180.1
					Prupe.5G179700	15111445	15115267	+	AT1G74920.1	ALDH10A8	aldehyde dehydrogenase 10A8 (*)	GO:0009414, GO:0009651, GO:0055114 , GO:0016491 , GO:0008152	response to water deprivation, response to salt stress, oxidation-reduction process , oxidoreductase activity , metabolic process
					Prupe.5G179800	15115521	15120624	+	AT1G74920.1	ALDH10A8	aldehyde dehydrogenase 10A8 (*)	GO:0009414, GO:0009651, GO:0055114 , GO:0016491 , GO:0008152	response to water deprivation, response to salt stress, oxidation-reduction process , oxidoreductase activity , metabolic process
					Prupe.5G179900	15121469	15125361	+	AT1G74910.1		ADP-glucose pyrophosphorylase family protein	GO:0016779 , GO:0009058	nucleotidyltransferase activity , biosynthetic process
					Prupe.5G180000	15125585	15129094	-	AT3G48160.2	DEL1 , E2FE , E2L3	DP-E2F-like 1	GO:0006355 , GO:0005667 , GO:0003700	regulation of transcription, DNA-templated , transcription factor complex , sequence-specific DNA binding transcription factor activity
					Prupe.5G180100	15130582	15132048	-	AT1G74900.1	OTP43	Pentatricopeptide repeat (PPR) superfamily protein
					Prupe.5G180200	15132155	15135271	+	AT3G48150.1	APC8 , CDC23	anaphase-promoting complex subunit 8	GO:0005515 , GO:0030071 , GO:0005680	protein binding , regulation of mitotic metaphase/anaphase transition , anaphase-promoting complex
					Prupe.5G180300	15135308	15137080	-	AT3G48140.1		B12D protein (***)	GO:0010150	leaf senescence
					Prupe.5G180400	15137439	15140480	-	AT3G48120.1
					Prupe.5G180500	15143941	15147417	+	AT3G48100.1	ARR5 , ATRR2 , IBC6 , RR5	response regulator 5	GO:0000160	phosphorelay signal transduction system
CPSCT026	AY426211.1	Pp07	11365276	11365753	Prupe.7G076800	11353358	11353983	+	AT4G29090.1		Ribonuclease H-like superfamily protein
					Prupe.7G076900	11355826	11361247	+	AT2G42120.2	POLD2	DNA polymerase delta small subunit	GO:0006260 , GO:0003887 , GO:0003677	DNA replication , DNA-directed DNA polymerase activity , DNA binding
					Prupe.7G077000	11361514	11363718	+	AT2G42110.1
					Prupe.7G077100	11365475	11369107	+	AT5G06750.3		Protein phosphatase 2C family protein (***)	GO:0003824 , GO:0006470 , GO:0004722	catalytic activity , protein dephosphorylation , protein serine/threonine phosphatase activity
					Prupe.7G077200	11366209	11366974	+
					Prupe.7G077300	11370172	11373189	-	AT3G12110.1	ACT11	actin-11
					Prupe.7G077400	11377165	11381039	+	AT2G42080.1		Chaperone DnaJ-domain superfamily protein (*)
					Prupe.7G077500	11382658	11386640	+	AT2G42070.1	ATNUDT23 , ATNUDX23 , NUDX23	nudix hydrolase homolog 23	GO:0016787	hydrolase activity
					Prupe.7G077600	11387451	11391526	+	AT3G12100.1		Cation efflux family protein	GO:0055085 , GO:0016021 , GO:0008324 , GO:0006812	transmembrane transport , integral component of membrane , cation transmembrane transporter activity , cation transport
					Prupe.7G077700	11388469	11388839	+
CPSCT042	AY426226.1	Pp07	16682143	16682742	Prupe.7G159800	16657799	16659730	+	AT2G18193.1		P-loop containing nucleoside triphosphate hydrolases superfamily protein	GO:0005524	ATP binding
					Prupe.7G159900	16660092	16661962	+	AT2G18193.1		P-loop containing nucleoside triphosphate hydrolases superfamily protein	GO:0005524	ATP binding
					Prupe.7G160000	16667952	16669705	+	AT2G18193.1		P-loop containing nucleoside triphosphate hydrolases superfamily protein	GO:0005524	ATP binding
					Prupe.7G160100	16671181	16675405	+	AT3G50950.2	ZAR1	HOPZ-ACTIVATED RESISTANCE 1	GO:0043531	ADP binding
					Prupe.7G160200	16676117	16681144	+	AT2G18180.1		Sec14p-like phosphatidylinositol transfer family protein (**)	GO:0006952	defense response
					Prupe.7G160300	16681927	16685137	+	AT2G18170.1	ATMPK7 , MPK7	MAP kinase 7	GO:0006468 , GO:0005524 , GO:0004672	protein phosphorylation , ATP binding , protein kinase activity
					Prupe.7G160400	16685190	16686646	+
					Prupe.7G160500	16687391	16687872	+	AT1G75388.1	CPuORF5	conserved peptide upstream open reading frame 5	GO:0005739	mitochondrion
					Prupe.7G160600	16687928	16688466	+	AT1G75390.1	AtbZIP44 , bZIP44	basic leucine-zipper 44 (*)(***)	GO:0043565 , GO:0006355 , GO:0003700, GO:0009410	sequence-specific DNA binding , regulation of transcription, DNA-templated , sequence-specific DNA binding transcription factor activity, response to xenobiotic stimulu
					Prupe.7G160700	16689958	16694587	-	AT4G18905.1		Transducin/WD40 repeat-like superfamily protein (**)	GO:0005515	protein binding
CPSCT018	AY426204.1	Pp08	123199	124139	Prupe.8G000700	98079	100368	-	AT4G10260.1		pfkB-like carbohydrate kinase family protein	GO:0004747, GO:0006014	ribokinase activity, D-ribose metabolic process
					Prupe.8G000800	101353	102665	-	AT4G10300.1		RmlC-like cupins superfamily protein
					Prupe.8G000900	103577	105107	-	AT3G01490.1		Protein kinase superfamily protein	GO:0004674	protein serine/threonine kinase activity
					Prupe.8G001000	106800	111996	-	AT1G33290.1		P-loop containing nucleoside triphosphate hydrolases superfamily protein	GO:0005524	ATP binding
					Prupe.8G001100	112089	113752	+	AT4G10330.1		glycine-rich protein
					Prupe.8G001200	114709	116781	+	AT4G10340.1	LHCB5	light harvesting complex of photosystem II 5	GO:0016020 , GO:0009765	membrane , photosynthesis, light harvesting
					Prupe.8G001300	117618	120231	+	AT3G48560.1	AHAS , ALS , CSR1 , IMR1 , TZP5	chlorsulfuron/imidazolinone resistant 1	GO:0030976 , GO:0000287 , GO:0003824	thiamine pyrophosphate binding , magnesium ion binding , catalytic activity
					Prupe.8G001400	121420	126875	-	AT1G33470.2		RNA-binding (RRM/RBD/RNP motifs) family protein (*)	GO:0003676, GO:0000398	nucleic acid binding, mRNA splicing, via spliceosome
					Prupe.8G001500	134377	136578	-	AT1G71310.1		cobalt ion binding
					Prupe.8G001600	137259	138869	-	AT1G71250.1		GDSL-like Lipase/Acylhydrolase superfamily protein (*)	GO:0016788	hydrolase activity, acting on ester bonds
					Prupe.8G001700	142735	143270	+
					Prupe.8G001800	143671	145768	+
(*) candidate gene related to stress resistance
(**) candidate gene related to fruit quality
(***) candidate gene related to plant development
